# Supplementary material for: Season of Conception and Risk of Cerebral Palsy
Source: PubMed Central journal article supplement (PMC10517373; doi:10.1001/jamanetworkopen.2023.35164), 2023-09-22
Supplement: jamanetwopen-e2335164-s001.pdf [file jamanetwopen-e2335164-s001.pdf]

## Supplemental Online Content

Zhuo H, Ritz B, Warren JL, Liew Z. Season of conception and risk of cerebral palsy. *JAMA Netw Open*. 2023;6(9):e2335164. doi:10.1001/jamanetworkopen.2023.35164

**eFigure 1.** Flowchart of the Study Population

**eFigure 2.** Birth Regions, DDS Center Locations, and Urban Areas of California

**eTable 1.** Sensitivity Analysis With Additional Adjustment for More Covariates

**eTable 2.** Sensitivity Analysis on Live Singleton Births Only

**eTable 3.** Sensitivity Analysis on Children Aged Less Than 6 at the DDS Services Establishment

**eTable 4.** Stratified Analysis by Maternal Individual SES (Race, Education)

**eTable 5.** Stratified Analysis by Sex

**eTable 6.** Stratified Analysis by Region of Birth Counties

**eTable 7.** Stratified Analysis by Subtypes of CP and Locations of Spastic CP

**eTable 8.** Mediation Analysis with Apgar Score and Maternal Pre-Eclampsia as Mediating Factors

This supplemental material has been provided by the authors to give readers additional information about their work.

**eFigure 1. Flowchart of the study population**

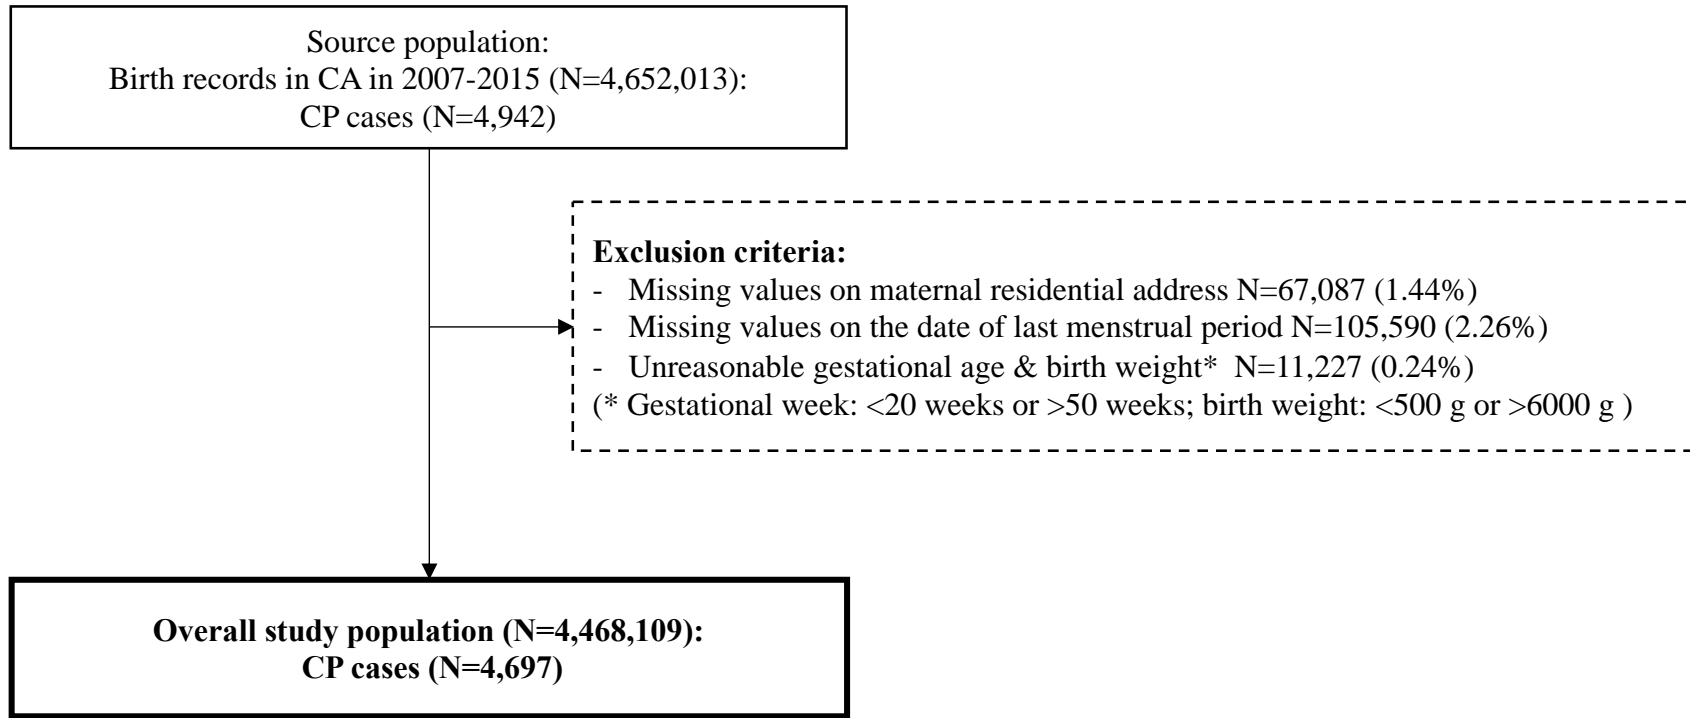

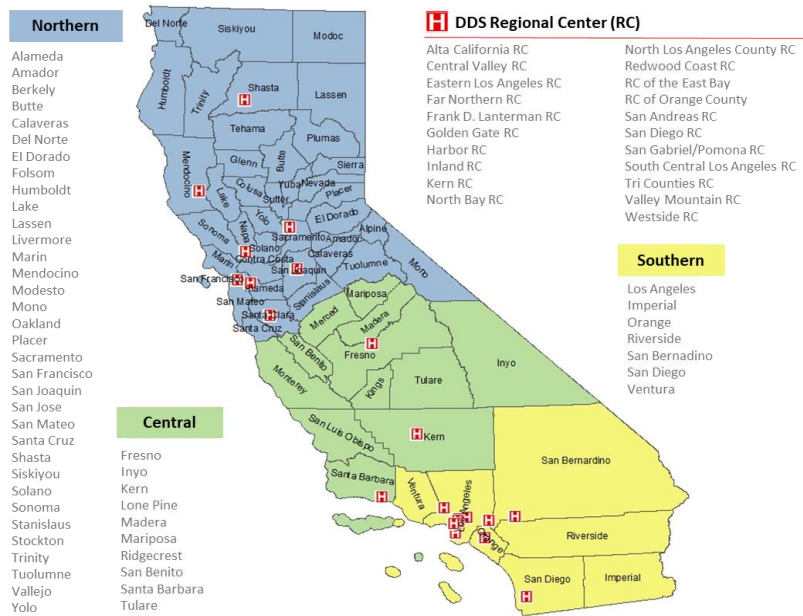

**eFigure 2a. Birth regions and DDS center locations**

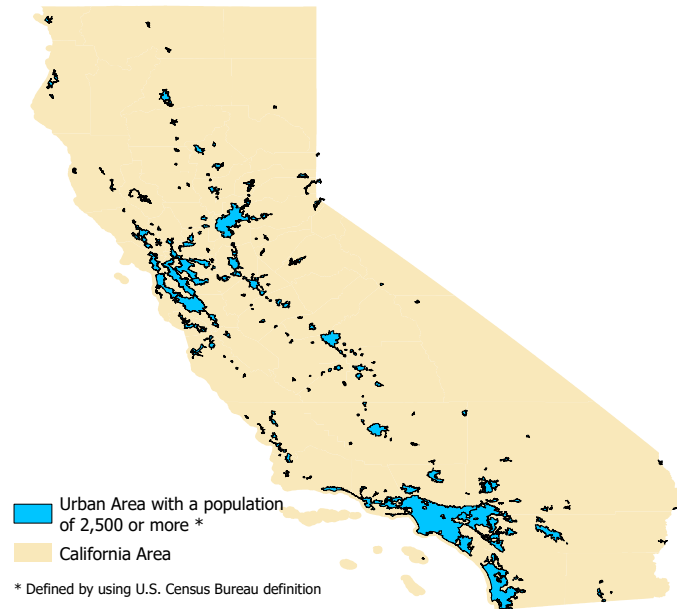

**eFigure 2b. Urban area in California**

**eTable 1. Associations between the month or the season of conception and cerebral palsy (CP) risk in California, 2007-2015, adjusting for additional covariates**

| Conception months/seasons | CP cases | Total Births | Crude RR (95% CI) | RR (95% CI) <sup>1</sup> | RR (95% CI) <sup>2</sup> |
|---------------------------|----------|--------------|-------------------|--------------------------|--------------------------|
| January                   | 420      | 379,904      | 1.14 (1.00, 1.31) | 1.14 (1.00, 1.32)        | 1.12 (0.98, 1.29)        |
| February                  | 396      | 354,325      | 1.14 (1.00, 1.32) | 1.15 (1.00, 1.32)        | 1.13 (0.98, 1.30)        |
| March                     | 352      | 364,071      | 0.98 (0.84, 1.13) | 0.99 (0.85, 1.15)        | 0.97 (0.84, 1.13)        |
| April                     | 393      | 358,236      | 1.13 (0.98, 1.30) | 1.10 (0.95, 1.27)        | 1.10 (0.95, 1.27)        |
| May                       | 419      | 367,340      | 1.16 (1.01, 1.33) | 1.15 (1.00, 1.32)        | 1.15 (1.00, 1.32)        |
| June                      | 385      | 362,071      | 1.09 (0.94, 1.26) | 1.07 (0.93, 1.24)        | 1.07 (0.93, 1.24)        |
| July                      | 354      | 359,058      | Ref               | Ref                      | Ref                      |
| August                    | 374      | 367,543      | 1.04 (0.90, 1.20) | 1.03 (0.89, 1.19)        | 1.03 (0.89, 1.19)        |
| September                 | 356      | 363,508      | 0.99 (0.86, 1.15) | 0.99 (0.85, 1.14)        | 0.99 (0.86, 1.15)        |
| October                   | 416      | 390,509      | 1.07 (0.93, 1.23) | 1.07 (0.93, 1.23)        | 1.07 (0.93, 1.23)        |
| November                  | 381      | 391,334      | 1.00 (0.86, 1.15) | 0.98 (0.84, 1.13)        | 0.98 (0.84, 1.13)        |
| December                  | 451      | 410,210      | 1.11 (0.96, 1.27) | 1.10 (0.96, 1.27)        | 1.10 (0.96, 1.27)        |
| Winter (Jan-March)        | 1168     | 1,098,300    | 1.08 (1.00, 1.16) | 1.09 (1.00, 1.18)        | 1.08 (0.98, 1.16)        |
| Spring (April-June)       | 1197     | 1,087,647    | 1.11 (1.02, 1.20) | 1.10 (1.01, 1.19)        | 1.10 (1.01, 1.19)        |
| Summer (July-Sept)        | 1084     | 1,090,109    | Ref               | Ref                      | Ref                      |
| Fall (Oct-Dec)            | 1248     | 1,192,053    | 1.05 (0.97, 1.14) | 1.04 (0.96, 1.13)        | 1.04 (0.96, 1.13)        |

<sup>1</sup>Adjusted for continuous birth year, child's sex, maternal age at delivery, race/ethnicity, education, smoking during pregnancy, pre-pregnancy BMI, maternal residential census-tract level social vulnerability index (SVI), and DDS catchment area. With additional adjustment for prenatal care, payment source for prenatal care, WIC benefits, and parity.

<sup>2</sup>Adjusted for categorical birth year (with 2005 as the reference), child's sex, maternal age at delivery, race/ethnicity, education, smoking during pregnancy, pre-pregnancy BMI, maternal residential census-tract level social vulnerability index (SVI), and DDS catchment area.

**eTable 2. Associations between the month or the season of conception and cerebral palsy (CP) risk among singleton live births in California, 2007-2015**

| Conception months/seasons | CP cases | Total Births | RR (95% CI)       |
|---------------------------|----------|--------------|-------------------|
| <b>Month</b>              |          |              |                   |
| January                   | 328      | 367,472      | 1.11 (0.96, 1.28) |
| February                  | 373      | 343,110      | 1.15 (1.00, 1.33) |
| March                     | 324      | 352,575      | 0.97 (0.83, 1.13) |
| April                     | 357      | 346,759      | 1.06 (0.92, 1.24) |
| May                       | 383      | 355,948      | 1.12 (0.97, 1.29) |
| June                      | 361      | 350,892      | 1.07 (0.92, 1.24) |
| July                      | 332      | 347,688      | Ref               |
| August                    | 349      | 356,252      | 1.03 (0.88, 1.19) |
| September                 | 322      | 352,086      | 0.96 (0.82, 1.11) |
| October                   | 385      | 378,253      | 1.06 (0.91, 1.22) |
| November                  | 354      | 379,076      | 0.96 (0.83, 1.12) |
| December                  | 414      | 398,586      | 1.07 (0.93, 1.24) |
| <b>Season</b>             |          |              |                   |
| Winter (Jan-March)        | 1079     | 1,063,157    | 1.08 (1.00, 1.18) |
| Spring (April-June)       | 1101     | 1,053,599    | 1.09 (1.01, 1.19) |
| Summer (July-Sept)        | 1003     | 1,056,026    | Ref               |
| Fall (Oct-Dec)            | 1153     | 1,155,915    | 1.04 (0.95, 1.13) |

Adjusted for birth year, child's sex, maternal age at delivery, race/ethnicity, education, smoking during pregnancy, pre-pregnancy BMI, maternal residential census-tract level social vulnerability index (SVI), and DDS catchment area.

**eTable 3. Associations between the season of conception and cerebral palsy (CP) risk in California among children with age less than 6 at DDS services establishment, 2007-2015**

| <b>Conception Season</b> | <b># Of CP</b> | <b>Total births</b> | <b>Adjusted RR</b> | <b>(95% CI)</b> |
|--------------------------|----------------|---------------------|--------------------|-----------------|
| Winter                   | 244            | 1097376             | 1.25               | (1.02, 1.53)    |
| Spring                   | 182            | 1086632             | 1.15               | (0.93, 1.42)    |
| Summer                   | 155            | 1089180             | Ref                |                 |
| Fall                     | 226            | 1191031             | 1.32               | (1.08, 1.62)    |

Adjusted for child's sex, maternal age at delivery, race/ethnicity, education, smoking during pregnancy, pre-pregnancy BMI, and maternal residential census-tract level social vulnerability index (SVI).

**eTable 4. Associations between the season of conception and cerebral palsy (CP) risk in California, 2007-2015, stratified by maternal education level and race/ethnicity**

| Season                          | CP/<br>Total births          | RR (95% CI)       | CP/<br>Total births                | RR (95% CI)       | CP/<br>Total births           | RR (95% CI)       | CP/<br>Total births      | RR (95% CI)       |
|---------------------------------|------------------------------|-------------------|------------------------------------|-------------------|-------------------------------|-------------------|--------------------------|-------------------|
| <b>Maternal education level</b> |                              |                   |                                    |                   |                               |                   |                          |                   |
|                                 | <b>High school and below</b> |                   | <b>College and above</b>           |                   |                               |                   |                          |                   |
| Winter                          | 896/772764                   | 1.10 (1.01, 1.21) | 229/284114                         | 1.04 (0.87, 1.25) |                               |                   |                          |                   |
| Spring                          | 949/765085                   | 1.15 (1.05, 1.27) | 206/283132                         | 0.91 (0.76, 1.10) |                               |                   |                          |                   |
| Summer                          | 811/754320                   | Ref               | 238/296543                         | Ref               |                               |                   |                          |                   |
| Fall                            | 965/842636                   | 1.06 (0.97, 1.17) | 238/305957                         | 0.97 (0.81, 1.16) |                               |                   |                          |                   |
| <b>Maternal race/ethnicity</b>  |                              |                   |                                    |                   |                               |                   |                          |                   |
|                                 | <b>Non-Hispanic White</b>    |                   | <b>Hispanic/Latinx of any race</b> |                   | <b>African American/Black</b> |                   | <b>Asian, and Other*</b> |                   |
| Winter                          | 309/301995                   | 1.18 (1.01, 1.38) | 622/548758                         | 1.06 (0.95, 1.19) | 96/62663                      | 0.96 (0.72, 1.28) | 117/164064               | 1.08 (0.83, 1.40) |
| Spring                          | 295/306886                   | 1.06 (0.90, 1.24) | 660/540366                         | 1.13 (1.01, 1.26) | 105/61792                     | 1.08 (0.82, 1.43) | 112/158455               | 1.02 (0.78, 1.33) |
| Summer                          | 290/319956                   | Ref               | 576/532767                         | Ref               | 94/60066                      | Ref               | 109/157266               | Ref               |
| Fall                            | 316/334035                   | 1.04 (0.89, 1.22) | 692/601395                         | 1.06 (0.95, 1.19) | 97/67559                      | 0.92 (0.69, 1.22) | 116/167124               | 1.00 (0.77, 1.29) |

Stratified by education, adjusted for birth year, child's sex, maternal age at delivery, race/ethnicity, smoking during pregnancy, pre-pregnancy BMI, maternal residential census-tract level social vulnerability index (SVI).

Stratified by race/ethnicity, adjusted for birth year, child's sex, maternal age at delivery, education, smoking during pregnancy, pre-pregnancy BMI, maternal residential census-tract level social vulnerability index (SVI).

\*Other include Pacific Islander, American Indian, Eskimo, Aleut, and other-unspecified

P-value for interactions: P-value=0.03 for interaction term education level & Spring; all other p-values >0.10

**eTable 5. Association between the season of conception and cerebral palsy (CP) risk in California, stratified by child's sex**

| Season | CP  | Total births | RR           | (95% CI)     | CP  | Total births | RR   | (95% CI)       | P-interaction |  |
|--------|-----|--------------|--------------|--------------|-----|--------------|------|----------------|---------------|--|
|        |     |              | <b>Males</b> |              |     |              |      | <b>Females</b> |               |  |
| Winter | 644 | 561626       | 1.09         | (0.97, 1.21) | 524 | 536670       | 1.10 | (0.97, 1.24)   | 0.94          |  |
| Spring | 651 | 556053       | 1.08         | (0.97, 1.21) | 546 | 531593       | 1.13 | (1.00, 1.27)   | 0.66          |  |
| Summer | 602 | 559647       | 1.00         |              | 482 | 530459       | 1.00 |                |               |  |
| Fall   | 689 | 610961       | 1.04         | (0.93, 1.16) | 559 | 581087       | 1.05 | (0.93, 1.18)   | 0.92          |  |

Adjusted for birth year, maternal age at delivery, race/ethnicity, education, smoking during pregnancy, pre-pregnancy BMI, maternal residential census-tract level social vulnerability index (SVI).



**eTable 6. Association between the season of conception and cerebral palsy (CP) risk in California, 2007-2015, stratified by geographical regions.**

| Season | CP              | Total births | RR (95% CI)       | CP             | Total births | RR (95% CI)       | CP              | Total births | RR (95% CI)       |
|--------|-----------------|--------------|-------------------|----------------|--------------|-------------------|-----------------|--------------|-------------------|
|        | <b>Northern</b> |              |                   | <b>Central</b> |              |                   | <b>Southern</b> |              |                   |
| Winter | 281             | 332078       | 1.20 (1.01, 1.42) | 114            | 127936       | 1.34 (1.02, 1.77) | 773             | 638286       | 1.02 (0.92, 1.13) |
| Spring | 262             | 331601       | 1.06 (0.89, 1.26) | 104            | 127498       | 1.16 (0.90, 1.52) | 831             | 628548       | 1.10 (1.00, 1.22) |
| Summer | 254             | 340936       |                   | 91             | 127937       |                   | 739             | 621236       |                   |
| Fall   | 288             | 361979       | 1.07 (0.90, 1.26) | 107            | 140812       | 1.06 (0.80, 1.40) | 853             | 689262       | 1.03 (0.94, 1.14) |
|        | <b>Urban</b>    |              |                   | <b>Rural</b>   |              |                   |                 |              |                   |
| Winter | 1127            | 1051594      | 1.09 (1.01, 1.19) | 41             | 46706        | 1.11 (0.71, 1.74) |                 |              |                   |
| Spring | 1144            | 1041090      | 1.09 (1.01, 1.19) | 53             | 46557        | 1.43 (0.94, 2.18) |                 |              |                   |
| Summer | 1043            | 1042891      | Ref               | 41             | 47218        | Ref               |                 |              |                   |
| Fall   | 1194            | 1140876      | 1.04 (0.96, 1.13) | 54             | 51177        | 1.24 (0.81, 1.90) |                 |              |                   |

Adjusted for birth year, maternal age at delivery, race/ethnicity, education, smoking during pregnancy, pre-pregnancy BMI, maternal residential census-tract level social vulnerability index (SVI).

P-value for interactions: All p-values >0.1

**eTable 7. Associations between seasons of conception and cerebral palsy (CP) risk among stratified population by CP subtypes and locations of spastic CP in California, 2007-2015**

| Seasons of conception                                    | CP cases | Total births | RR (95% CI)       |
|----------------------------------------------------------|----------|--------------|-------------------|
| <b>Spastic CP</b>                                        |          |              |                   |
| Winter                                                   | 596      | 1097728      | 1.16 (1.03, 1.30) |
| Spring                                                   | 619      | 1087069      | 1.18 (1.05, 1.38) |
| Summer                                                   | 522      | 1089547      | Ref               |
| Fall                                                     | 640      | 1191445      | 1.11 (0.99, 1.25) |
| <b>Ataxic CP</b>                                         |          |              |                   |
| Winter                                                   | 55       | 1097187      | 1.04 (0.72, 1.53) |
| Spring                                                   | 48       | 1086498      | 0.89 (0.60, 1.31) |
| Summer                                                   | 54       | 1089079      | Ref               |
| Fall                                                     | 57       | 1190862      | 0.97 (0.67, 1.40) |
| <b>Dyskinetic CP</b>                                     |          |              |                   |
| Winter                                                   | 23       | 1097155      | 0.92 (0.52, 1.61) |
| Spring                                                   | 22       | 1086472      | 0.85 (0.48, 1.50) |
| Summer                                                   | 26       | 1089051      | Ref               |
| Fall                                                     | 30       | 1190835      | 1.04 (0.62, 1.76) |
| <b>Other subtypes (including Hypotonic and mixed CP)</b> |          |              |                   |
| Winter                                                   | 484      | 1097616      | 1.04 (0.91, 1.18) |
| Spring                                                   | 495      | 1086945      | 1.06 (0.93, 1.20) |
| Summer                                                   | 466      | 1089491      | Ref               |
| Fall                                                     | 502      | 1191307      | 0.98 (0.86, 1.11) |
| <b>Bilateral, Spastic CP</b>                             |          |              |                   |
| Winter                                                   | 438      | 1097570      | 1.17 (1.01, 1.34) |
| Spring                                                   | 447      | 1086897      | 1.17 (1.02, 1.34) |
| Summer                                                   | 382      | 1089407      | Ref               |
| Fall                                                     | 471      | 1191276      | 1.12 (0.98, 1.28) |
| <b>Unilateral, Spastic CP</b>                            |          |              |                   |
| Winter                                                   | 136      | 1097268      | 1.14 (0.89, 1.45) |
| Spring                                                   | 149      | 1086599      | 1.23 (0.97, 1.57) |
| Summer                                                   | 121      | 1089146      | Ref               |
| Fall                                                     | 149      | 1190954      | 1.12 (0.88, 1.42) |

Adjusted for birth year, maternal age at delivery, race/ethnicity, education, smoking during pregnancy, pre-pregnancy BMI, maternal residential census-tract level social vulnerability index (SVI).

**eTable 8. Mediation analysis of the associations between the season of conception and cerebral palsy (CP) risk with Apgar score and maternal pre-eclampsia as mediating factors**

| Season of conception           | Natural direct effect risk ratio (95% CI) | Natural Indirect effect risk ratio (95% CI) | Percentage (%) Mediated |
|--------------------------------|-------------------------------------------|---------------------------------------------|-------------------------|
| <b>Apgar score at 5 min</b>    |                                           |                                             |                         |
| Winter                         | 1.10 (1.04, 1.17)                         | 1.00 (1.00, 1.01)                           | 0.8%                    |
| Spring                         | 1.10 (1.07, 1.16)                         | 1.01 (1.01, 1.02)                           | 10.4%                   |
| Summer                         | Ref                                       | Ref                                         | Ref                     |
| Fall                           | 1.05 (0.98, 1.14)                         | 1.00 (1.00, 1.01)                           | 6.1%                    |
| <b>Maternal pre-eclampsia*</b> |                                           |                                             |                         |
| Winter                         | 1.12 (0.98, 1.21)                         | 1.00 (1.00, 1.01)                           | 0.4%                    |
| Spring                         | 1.04 (0.99, 1.09)                         | 1.00 (1.00, 1.01)                           | 0.9%                    |
| Summer                         | Ref                                       | Ref                                         | Ref                     |
| Fall                           | 1.04 (0.95, 1.20)                         | 1.00 (1.00, 1.01)                           | 4.0%                    |

Adjusted for birth year, child's sex, maternal age at delivery, race/ethnicity, education, smoking during pregnancy, and pre-pregnancy BMI, and maternal residential census-tract level social vulnerability index (SVI).

\*35% population has missing values on pre-eclampsia and the estimated total effects are slightly different from other total effects
