# Supplementary material for: Season of Conception and Risk of Cerebral Palsy
Source: PubMed Central journal article supplement (PMC10517373; doi:10.1001/jamanetworkopen.2023.35164), 2023-09-22
Supplement: jamanetwopen-e2335164-s002.pdf [file jamanetwopen-e2335164-s002.pdf]

## **Data Sharing Statement**

Zhuo. Season of Conception and Risk of Cerebral Palsy. *JAMA Netw Open*. Published September 22, 2023. doi:10.1001/jamanetworkopen.2023.35164

### **Data**

**Data available:** No
